# Supplementary material for: MRI with hyperpolarised [1-13C]pyruvate detects advanced pancreatic preneoplasia prior to invasive disease in a mouse model
Source: Gut. 2015 Sep 7;65(3):465–75. doi: 10.1136/gutjnl-2015-310114 (PMC4789827; doi:10.1136/gutjnl-2015-310114)
Supplement: Web supplement [file gutjnl-2015-310114-s1.pdf]

## SUPPLEMENTARY INFORMATION

Magnetic resonance imaging with hyperpolarized [1-<sup>13</sup>C]pyruvate detects advanced pancreatic preneoplasia prior to invasive disease in mouse model

Eva M. Serrao<sup>1,2</sup>, Mikko I. Kettunen<sup>1,2,3</sup>, Tiago B. Rodrigues<sup>1,2</sup>, Piotr Dzien<sup>1,2</sup>, Alan J. Wright<sup>1,2</sup>, Aarthi Gopinathan<sup>1</sup>, Ferdia A. Gallagher<sup>1,4</sup>, David Y. Lewis<sup>1,2</sup>, Kristopher K. Frese<sup>5</sup>, Jaime Almeida<sup>1</sup>, William J. Howat<sup>1</sup>, David A. Tuveson<sup>6</sup>, Kevin M. Brindle<sup>1,2†</sup>

<sup>1</sup>Cancer Research UK Cambridge Institute, University of Cambridge, UK

<sup>2</sup>Department of Biochemistry, University of Cambridge, UK

<sup>3</sup>A.I.Virtanen Institute for Molecular Sciences, University of Eastern Finland, Kuopio, Finland

<sup>4</sup>Department of Radiology, University of Cambridge, Cambridge, UK

<sup>5</sup>Princess Margaret Cancer Centre, 610 University Ave, Toronto, ON, M6C 1K6, Canada

<sup>6</sup>Cold Spring Harbor Laboratory, NY, USA

## SUPPLEMENTARY METHODS

### Quantitative PCR

FAM labeled assays were used in conjunction with TaqmanFast mastermix 384-wellplates.

Actin was used as the endogenous control.

### List of Taqman probes:

| <i>Gene</i> | <i>Gene Name</i>                                                    | <i>Abbreviation</i> | <i>Taqman Code</i> |
|-------------|---------------------------------------------------------------------|---------------------|--------------------|
| Actb        | actin                                                               |                     | Mm00607939_s1      |
| Gck         | glucokinase                                                         | GK                  | Mm00439129_m1      |
| Hk1         | hexokinase 1                                                        | HK1                 | Mm00439344_m1      |
| Hk2         | hexokinase 2                                                        | HK2                 | Mm00443385_m1      |
| Slc2a1      | solute carrier family 2 (facilitated glucose transporter), member 1 | GLUT-1              | Mm00441473_m1      |
| Slc2a2      | solute carrier family 2 (facilitated glucose transporter), member 2 | GLUT-2              | Mm00446229_m1      |
| Slc2a3      | solute carrier family 2 (facilitated glucose transporter), member 3 | GLUT-3              | Mm00441483_m1      |
| Slc2a4      | solute carrier family 2 (facilitated glucose transporter), member 4 | GLUT-4              | Mm00436615_m1      |
| Slc5a1      | solute carrier family 5 (sodium/glucose cotransporter), member 1    | SGLT1               | Mm00451203_m1      |

## SUPPLEMENTARY TABLES AND FIGURES

**Supplementary Table S1.** Mean coefficient of variation of the hyperpolarized [1-<sup>13</sup>C]Alanine/[1-<sup>13</sup>C]Lactate signal ratios in control, KC and KPC mice following repeat measurements.

| Mouse no  | Measurement 1 | Measurement 2 | Mean  | SD    | COV   |
|-----------|---------------|---------------|-------|-------|-------|
| 1         | 0.289         | 0.281         | 0.285 | 0.006 | 0.021 |
| 2         | 0.165         | 0.091         | 0.128 | 0.052 | 0.408 |
| 3         | 0.173         | 0.154         | 0.163 | 0.013 | 0.082 |
| 4         | 0.149         | 0.072         | 0.111 | 0.055 | 0.496 |
| 5         | 0.729         | 0.568         | 0.648 | 0.113 | 0.175 |
| 6         | 0.176         | 0.243         | 0.210 | 0.048 | 0.227 |
| 7         | 0.174         | 0.232         | 0.203 | 0.041 | 0.204 |
| 8         | 0.212         | 0.231         | 0.222 | 0.013 | 0.059 |
| Mean COV: |               |               |       |       | 0.209 |

Hyperpolarized [1-<sup>13</sup>C]alanine/[1-<sup>13</sup>C]lactate signal ratios observed in <sup>13</sup>C chemical shift images of the pancreas from control (n=1), 9 month-old KC mice (n=3) and KPC mice with PDA tumors (n=4), acquired 24 hours apart. n= number of animals.

**Supplementary Table S2.** Rate of [3-<sup>13</sup>C]alanine formation and alanine transaminase activity.

| Rate of [3- <sup>13</sup> C]alanine formation and alanine transaminase activity |                                         |                                         |
|---------------------------------------------------------------------------------|-----------------------------------------|-----------------------------------------|
| Tissue type                                                                     | Concentration of alanine (mM)           | Rate (x10 <sup>-7</sup> ) M/s           |
| <i>9 month-old KC mice pancreas</i>                                             | 1                                       | 2.76                                    |
| <i>9 month-old KC mice pancreas</i>                                             | 5                                       | 3.43                                    |
| <i>9 month-old KC mice pancreas</i>                                             | 10                                      | 5.15                                    |
| Tissue type                                                                     | ALT activity at time point 1<br>(mU/mL) | ALT activity at time point 2<br>(mU/mL) |
| <i>9 month-old KC mice pancreas</i>                                             | 126.67                                  | 98.25                                   |

The rates <sup>13</sup>C label exchange between 10 mM [3-<sup>13</sup>C]pyruvate and the indicated unlabeled alanine concentrations were measured dynamically by <sup>1</sup>H NMR. Enzyme activity was determined by spectrophotometric assay in the same extract at the start (time point 1) and at the end (time point 2) of the NMR spectral acquisition. There was some loss of enzyme activity during the incubation.

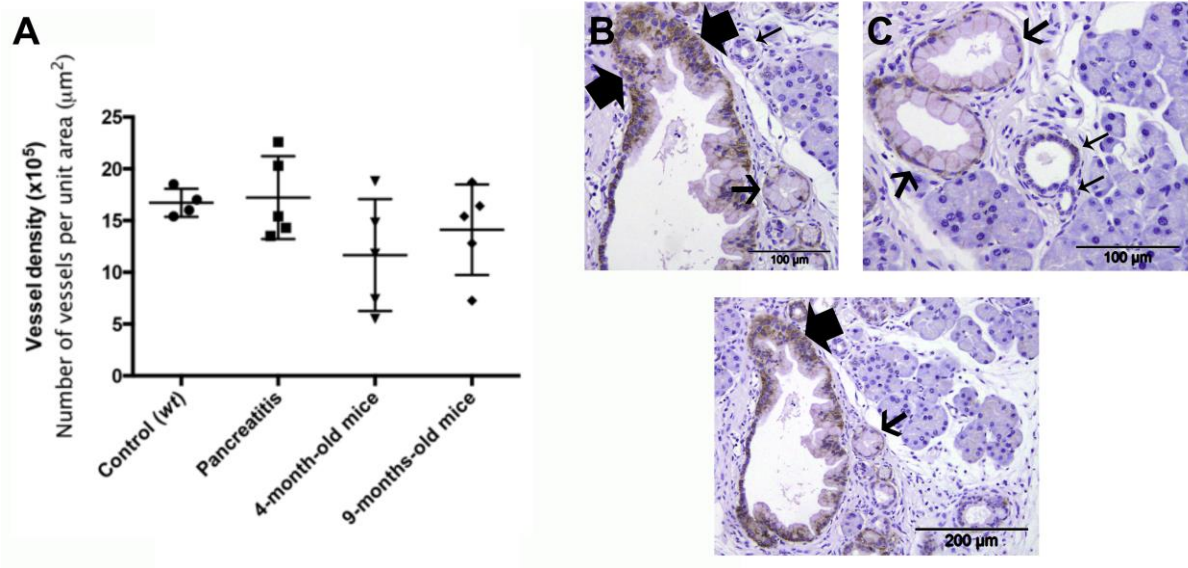

**Supplementary Figure S1.** Quantitation of blood vessel density in pancreatic tissues from *wt* controls (n=4), *wt* mice with caerulein-induced pancreatitis (n=5), PanIN tissues from 4 (n=5) and 9 (n=5) month-old KC mice (A). Immunohistochemical staining for CAIX expression counterstained with H&E in representative sections from 9 month-old KC mice (B-D). Thick arrows indicate high-grade mPanIN; thin arrows indicate low-grade lesions and small arrows indicate normal ducts.

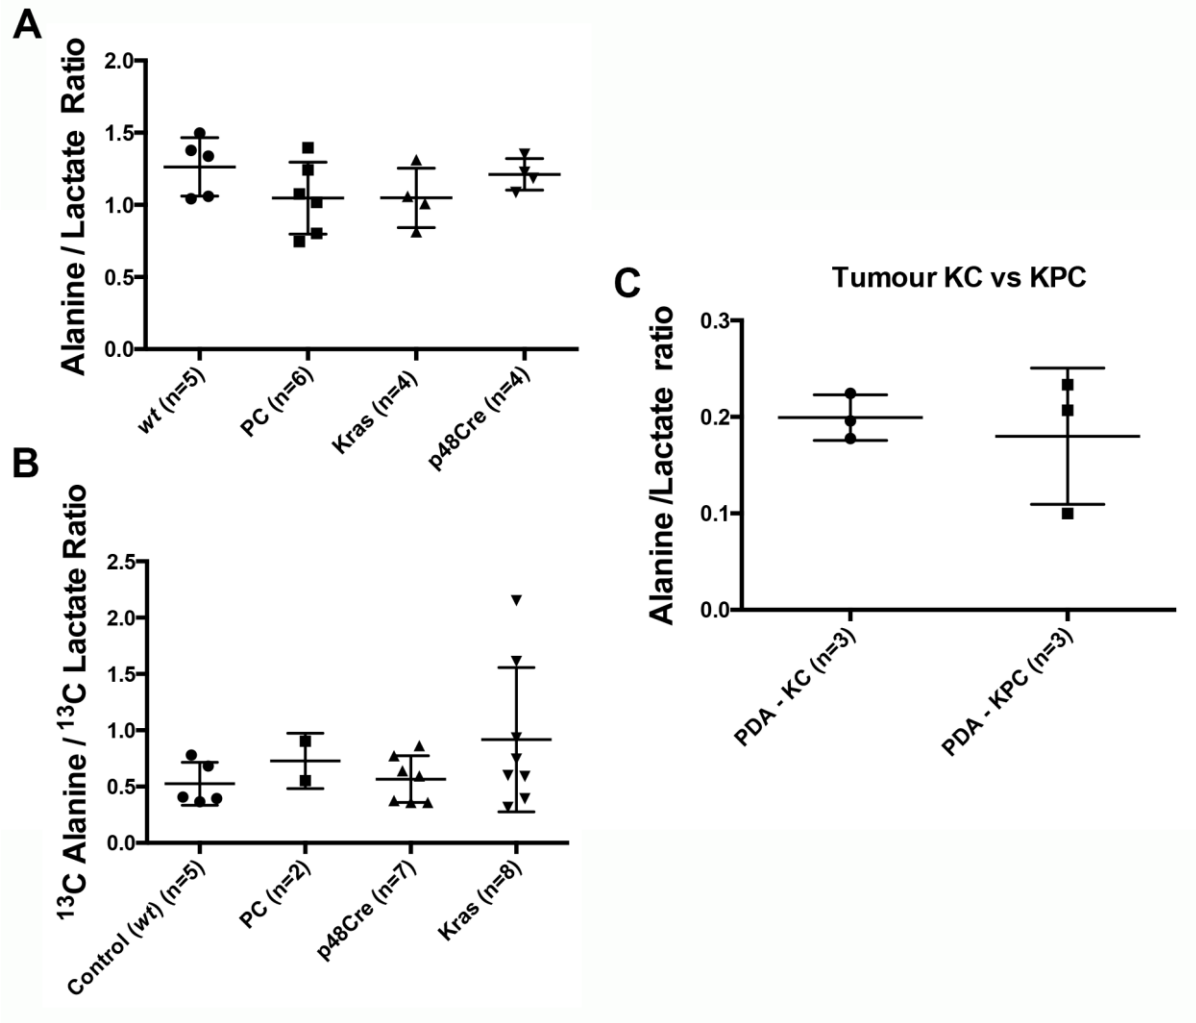

**Supplementary Figure S2.** Alanine/lactate concentration ratios measured by  $^1\text{H}$  NMR in pancreatic tissue extracts prepared from mice with the indicated genotype, in which disease does not develop (A), and the corresponding hyperpolarized  $[1-^{13}\text{C}]\text{alanine}/[1-^{13}\text{C}]\text{lactate}$  signal ratios observed in  $^{13}\text{C}$  chemical shift images of the pancreas of these animals (B). Alanine/lactate concentration ratios measured by  $^1\text{H}$  NMR in PDA tumors from KC and KPC mice (C). Mean  $\pm$  S.E.M.; \*  $p < 0.05$ , \*\*  $p < 0.01$ , \*\*\*  $p < 0.001$ . n= number of animals.

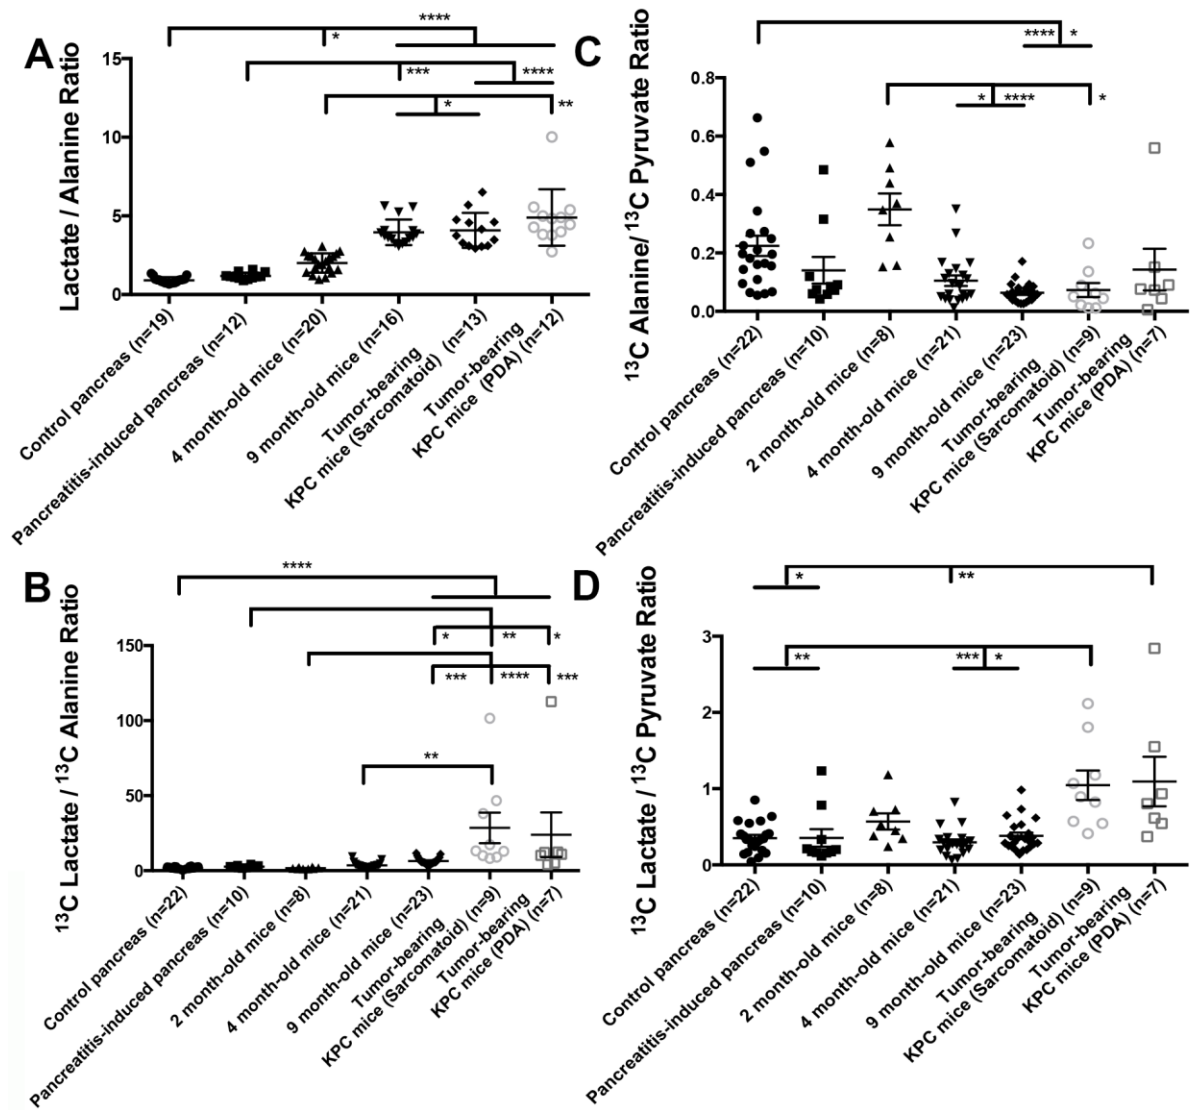

**Supplementary Figure S3.** Lactate/alanine concentration ratios measured by  $^1\text{H}$  NMR in pancreatic tissue extracts (A) and the corresponding hyperpolarized  $[1-^{13}\text{C}]\text{lactate}/[1-^{13}\text{C}]\text{alanine}$  signal ratios observed in  $^{13}\text{C}$  chemical shift images of the pancreas (B). Hyperpolarized  $[1-^{13}\text{C}]\text{alanine}/[1-^{13}\text{C}]\text{pyruvate}$  (C) and  $[1-^{13}\text{C}]\text{lactate}/[1-^{13}\text{C}]\text{pyruvate}$  (D) signal ratios observed in  $^{13}\text{C}$  chemical shift images of the pancreas. Mean  $\pm$  S.E.M.; \*  $p < 0.05$ , \*\*  $p < 0.01$ , \*\*\*  $p < 0.001$ , \*\*\*\*  $p < 0.0001$ .
